# Supplementary material for: Size-dependent aggregates of gold nanoparticles induced by a “molecular fork”
Source: Royal Society of Chemistry journal article supplement (doi:10.1039/b500721f), 2005-01-01
Supplement: b500721f.pdf [file b500721f.pdf]

## Supporting Information

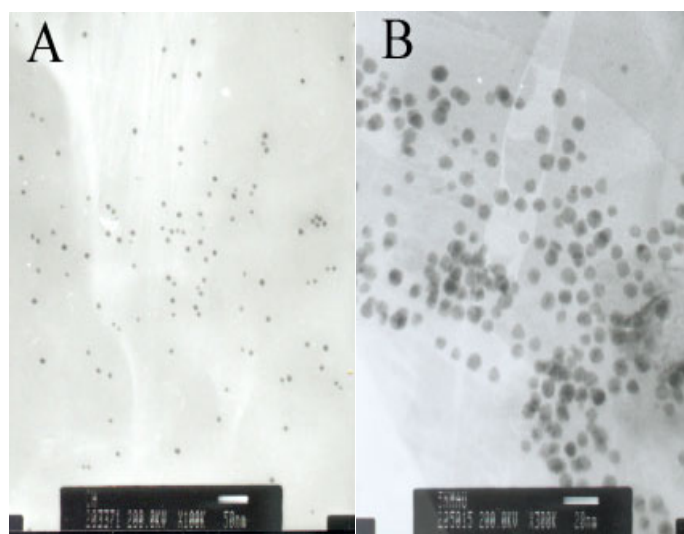

**Figure S1.** TEM images of 5 nm Au NPs after excessive molecular fork were added to its solution.
